# Supplementary material
Source: Research Square preprint supplement (doi:10.21203/rs.3.rs-9237776/v1)
Supplement: Supplementary file 1 [file 9c84229815211c6e3a61a09b.pdf]

23 **Online Resource 1**

24 **Dissolved gas analysis**

25 Dissolved concentrations of N<sub>2</sub>, O<sub>2</sub>, and Argon (Ar) in water samples were determined  
 26 using a Membrane Inlet Mass Spectrometer (MIMS). Each gas was analyzed according to its  
 27 atomic mass-to-charge-ratio as follows: N<sub>2</sub> at *m/z* 28, O<sub>2</sub> at *m/z* 32, and Ar at *m/z* 40. Standards  
 28 for dissolved gas were prepared by continuously stirring deionized water to make sure that the  
 29 gas concentrations were in equilibrium with the atmosphere. The deionized water was kept in a 1  
 30 L round-bottomed flask and placed in a water bath set at 24°C.

31 To determine the concentration of each gas, the thermodynamically expected  
 32 concentration at 24°C, which was adjusted for atmospheric pressure (Weiss, 1970) was divided  
 33 by the average *m/z* signal obtained from triplicate standard measurements. The slope between  
 34 each set of standards was used as a calibration factor to adjust *m/z* signal of N<sub>2</sub>, O<sub>2</sub>, and Ar in  
 35 each sample before calculating concentrations of each gas. The Ar ratio method in R (*mimsy*  
 36 package) was used to correct for physical effects on N<sub>2</sub> and O<sub>2</sub> concentrations (Kelly, 2020).  
 37 Because Ar only changes due to physical processes, while O<sub>2</sub> and N<sub>2</sub> respond to both physical  
 38 and biological processes, the effects of physical changes on the measured gas concentrations can  
 39 be corrected using Ar ratio as follows:

40

$$42 \quad [BG]_{sample} = \left( \frac{uncorrected[BG]_{sample}}{[Ar]_{sample}} \times [Ar]_{expected} \right) \left( \frac{[BG]_{expected}/[Ar]_{expected}}{[BG]_{standard}/[Ar]_{standard}} \right)$$

41

43 where,

44  $[BG]_{sample}$  = corrected concentration of biologically active gas (N<sub>2</sub> and O<sub>2</sub>),

45  $uncorrected[BG]_{sample}$  = concentration of N<sub>2</sub> and O<sub>2</sub> before Ar ratio correction,

46  $[Ar]_{sample}$  = Ar concentration in the same sample,  
 47  $[Ar]_{expected}$  = thermodynamic Ar concentration at 24°C,  
 48  $[BG]_{expected}/[Ar]_{expected}$  = thermodynamically expected N<sub>2</sub>: Ar and O<sub>2</sub>: Ar  
 49 measurements at 24°C, and  
 50  $[BG]_{standard}/[Ar]_{standard}$  = N<sub>2</sub>: Ar and O<sub>2</sub>: Ar measurements averaged over three  
 51 triplicate standards.

52 The output gas concentrations from MIMS were expressed as mg L<sup>-1</sup> of N<sub>2</sub> and O<sub>2</sub> and  
 53 the areal flux for each sediment core was expressed as mg m<sup>-2</sup> h<sup>-1</sup>.

54

## 55 **Soil properties**

56 Approximately half of the homogenized soil sample from each 0-10 cm soil core was  
 57 used for nutrient analysis. Soil samples were dried in an oven at 60°C and ground to pass a 2 mm  
 58 mesh screen. A subset of ground soil was transferred to fill 20 mL scintillation vials and shipped  
 59 to the Soil Testing Laboratory at Kansas State University where TC, TN, and extractable P were  
 60 analyzed. Total C and TN were analyzed by dry combustion (Wright & Bailey, 2001), while  
 61 Mehlich-3 extraction and colorimetry (Mehlich, 1984) were used to determine "plant-available"  
 62 P (orthophosphate). Soil nutrient concentrations were reported as mg g<sup>-1</sup> dry weight.

63 Soil moisture was measured using the thermogravimetric method, which involved  
 64 weighing a fresh sample before and after oven drying (Evetts et al., 2008). A 30 g fresh  
 65 homogenized subsample from each 0-10 cm soil core was oven-dried at 105°C. Soil moisture  
 66 was reported as g g<sup>-1</sup> of dry soil. Assuming uniform pore size for each core, the moisture loss  
 67 from the 30 g sample was used to calculate moisture loss for the total soil mass of 456.04 cm<sup>3</sup>  
 68 (volume of the acrylic tube). Bulk density was reported as g cm<sup>-3</sup>.

69 Soil pH was measured using a handheld pH meter in a 1:2 fresh soil-to-water ratio after a  
 70 30-minute equilibrium (Reddy et al., 2013), with three-point calibration (pH 4, 7, and 10  
 71 buffers). A 10 g homogenized soil subsample was mixed with 20 ml deionized water in a 50 ml  
 72 beaker. The suspension was stirred for 10 seconds every 5 minutes over a 30-minute period.  
 73 After settling for 30 more minutes, the pH was measured by immersing the electrode in the  
 74 supernatant and recording the value once stabilized (usually within 1 minute).

75

76 **Table S1** Soil properties mean  $\pm$  95% CI for 21 easements and 5 restoration practices. The soil  
 77 properties include O<sub>2</sub> flux, soil moisture (SM), bulk density (BD), pH, total carbon (TC), total  
 78 nitrogen (TN), and extractable phosphorus (P). Means associated with different lowercase letters  
 79 are significantly different by post hoc analysis

| Restoration practices                                              | Natural regeneration (n=7)          | Remnant forest (n=16)             | Shallow water-dry (n=15)           | Shallow water-wet (n=18)            | Tree planting (n=17)               | All practices (n=73) |
|--------------------------------------------------------------------|-------------------------------------|-----------------------------------|------------------------------------|-------------------------------------|------------------------------------|----------------------|
| <b>24 h O<sub>2</sub></b><br>(mg m <sup>-2</sup> h <sup>-1</sup> ) | -78.26 $\pm$<br>4.57 <sup>a</sup>   | -48.75 $\pm$<br>6.19 <sup>b</sup> | -56.12 $\pm$<br>9.78 <sup>bc</sup> | -61.81 $\pm$<br>8.62 <sup>abc</sup> | -64.70 $\pm$<br>6.37 <sup>ac</sup> | -60.03 $\pm$<br>3.80 |
| <b>48 h O<sub>2</sub></b><br>(mg m <sup>-2</sup> h <sup>-1</sup> ) | -103.13 $\pm$<br>11.44 <sup>a</sup> | -88.99 $\pm$<br>5.49 <sup>b</sup> | -91.49 $\pm$<br>5.92 <sup>ab</sup> | -93.99 $\pm$<br>5.66 <sup>ab</sup>  | -97.99 $\pm$<br>5.08 <sup>ab</sup> | -94.23 $\pm$<br>2.64 |
| <b>SM</b><br>(g g <sup>-1</sup> )                                  | 0.46 $\pm$<br>0.29 <sup>ab</sup>    | 0.41 $\pm$<br>0.10 <sup>b</sup>   | 0.52 $\pm$<br>0.13 <sup>ab</sup>   | 0.71 $\pm$<br>0.10 <sup>a</sup>     | 0.35 $\pm$<br>0.08 <sup>b</sup>    | 0.50 $\pm$<br>0.06   |
| <b>BD</b><br>(g cm <sup>-3</sup> )                                 | 1.01 $\pm$<br>0.15 <sup>a</sup>     | 0.99 $\pm$<br>0.06 <sup>a</sup>   | 1.02 $\pm$<br>0.12 <sup>a</sup>    | 1.00 $\pm$<br>0.06 <sup>a</sup>     | 1.09 $\pm$<br>0.09 <sup>a</sup>    | 1.03 $\pm$<br>0.04   |
| <b>pH</b>                                                          | 5.46 $\pm$<br>0.61 <sup>a</sup>     | 5.40 $\pm$<br>0.22 <sup>a</sup>   | 5.32 $\pm$<br>0.31 <sup>a</sup>    | 5.80 $\pm$<br>0.27 <sup>a</sup>     | 5.34 $\pm$<br>0.17 <sup>a</sup>    | 5.47 $\pm$<br>0.12   |
| <b>TC</b><br>(mg g <sup>-1</sup> )                                 | 19.95 $\pm$<br>4.91 <sup>ab</sup>   | 22.48 $\pm$<br>4.72 <sup>a</sup>  | 16.68 $\pm$<br>3.87 <sup>ab</sup>  | 14.52 $\pm$<br>2.97 <sup>b</sup>    | 18.01 $\pm$<br>4.01 <sup>ab</sup>  | 18.04 $\pm$<br>1.78  |
| <b>TN</b><br>(mg g <sup>-1</sup> )                                 | 1.92 $\pm$<br>0.39 <sup>a</sup>     | 2.12 $\pm$<br>0.37 <sup>a</sup>   | 1.71 $\pm$<br>0.34 <sup>a</sup>    | 1.56 $\pm$<br>0.25 <sup>a</sup>     | 1.70 $\pm$<br>0.29 <sup>a</sup>    | 1.78 $\pm$<br>0.14   |
| <b>P</b><br>(mg g <sup>-1</sup> )                                  | 0.05 $\pm$<br>0.01 <sup>a</sup>     | 0.05 $\pm$<br>0.01 <sup>a</sup>   | 0.04 $\pm$<br>0.01 <sup>a</sup>    | 0.04 $\pm$<br>0.01 <sup>a</sup>     | 0.04 $\pm$<br>0.01 <sup>a</sup>    | 0.04 $\pm$<br>0.004  |

80

81

82

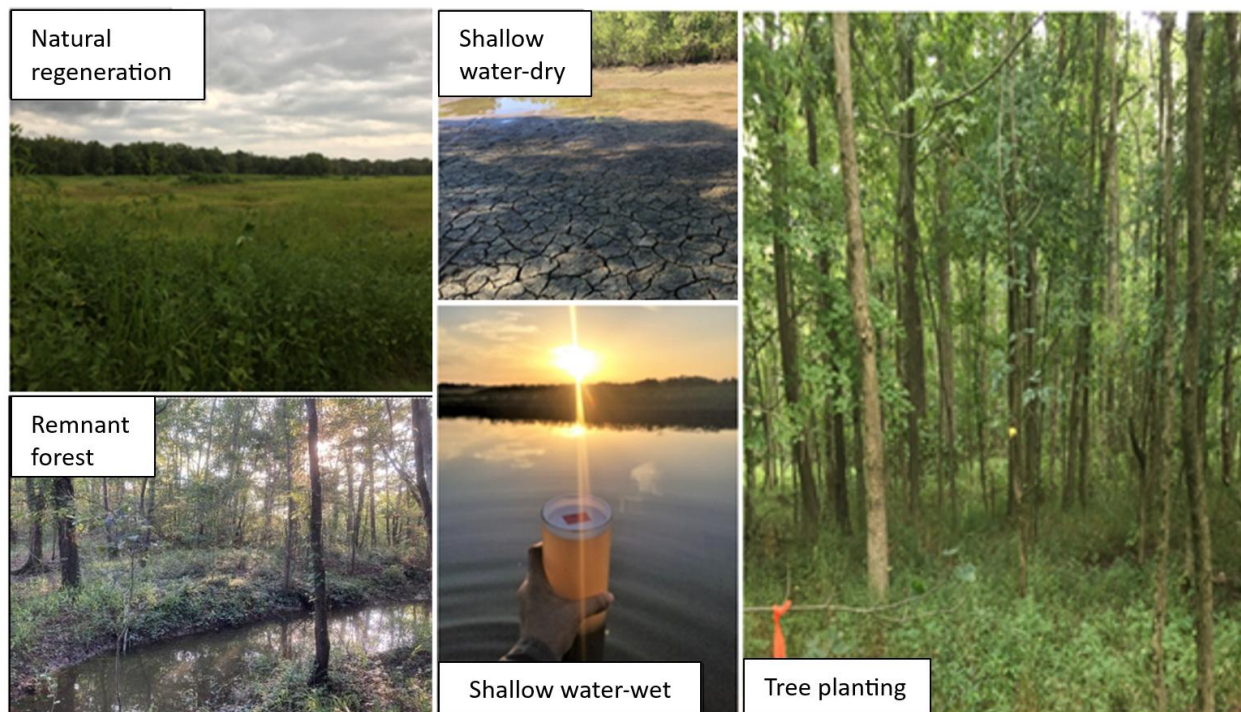

83

84 **Fig. S1** Examples of each restoration practice sampled in the study sites

85

86

87

88

89

90

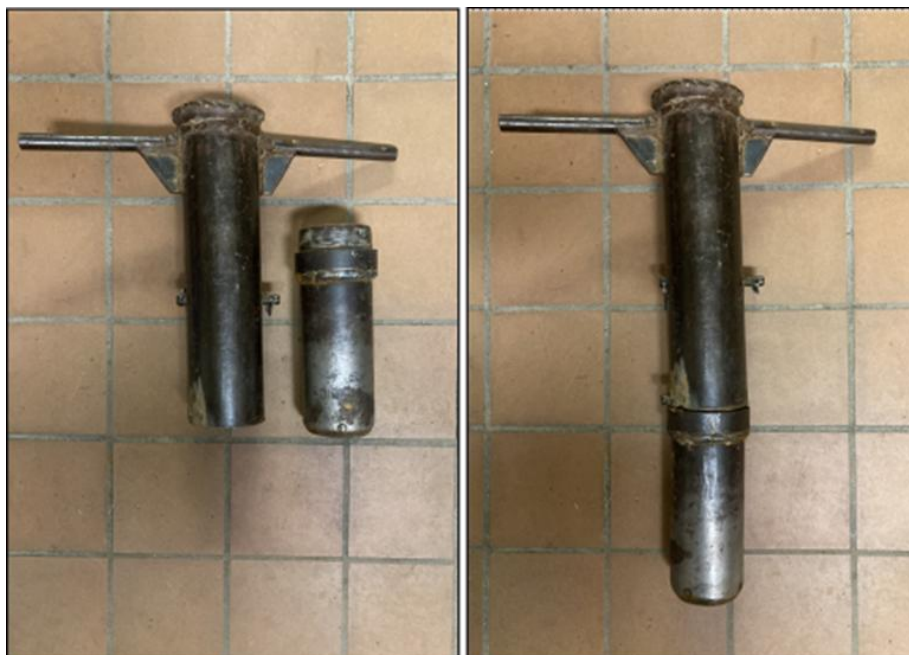

91

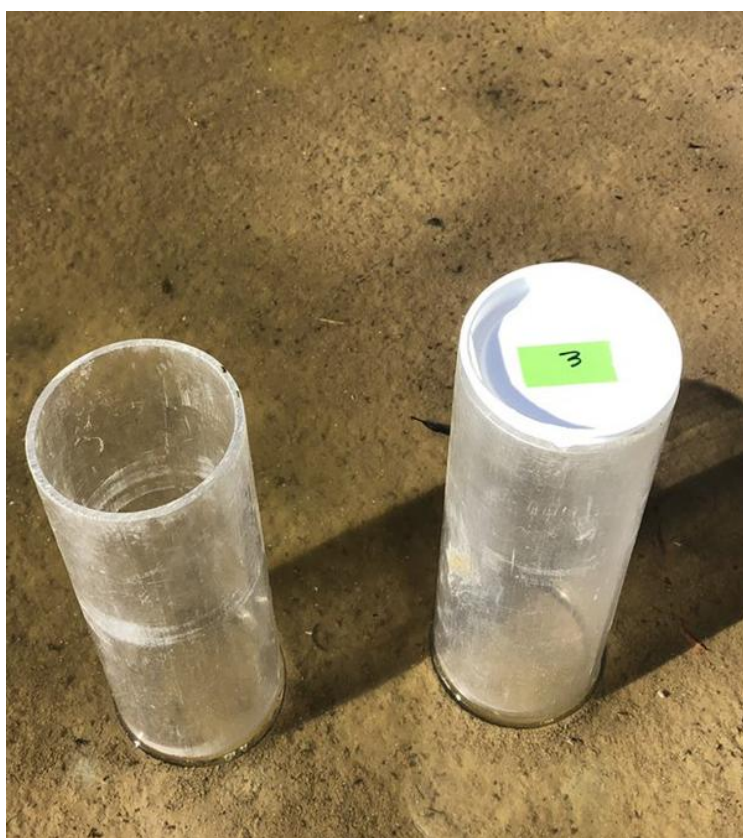

92

93

94

**Fig. S2** Welded steel corer assembly (top) and paired soil function and soil structure cores (bottom)

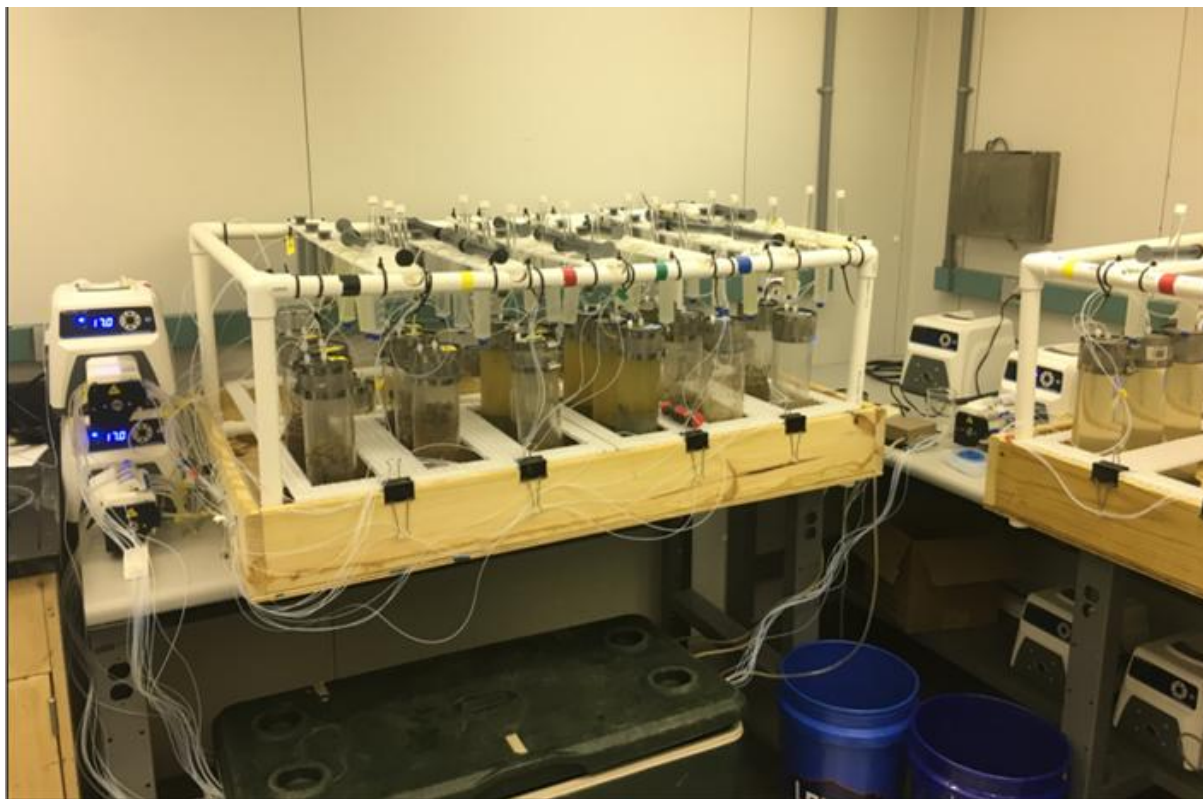

95

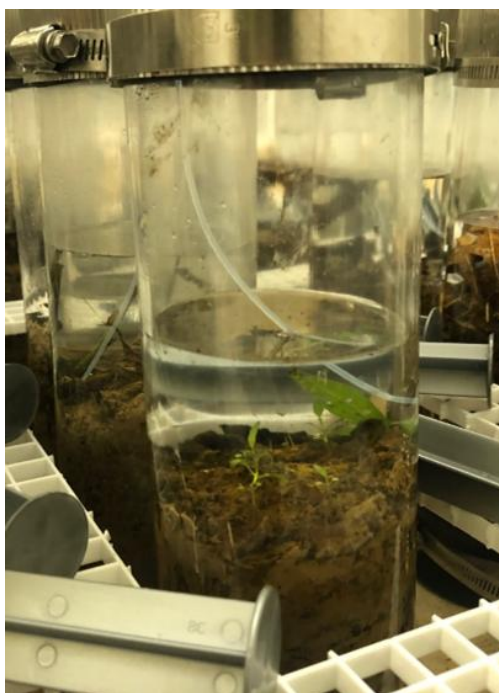

96

97 **Fig. S3** Flow-through incubation setup in an environment chamber with peristaltic pumps and  
98 the recirculating system (top) and a close-up image of incubation cores (bottom)

99

100  
101  
102  
103  
104  
105  
106  
107  
108  
109  
110  
111  
112  
113  
114  
115  
116  
117  
118  
119

## REFERENCES

- Evett, S. R., Heng, L. K., Moutonnet, P., & Nguyen, M. L. (2008). *Field Estimation of Soil Water Content: A Practical Guide to Methods, Instrumentation and Sensor Technology*. [http://www-pub.iaea.org/MTCD/publications/PDF/TCS-30\\_web.pdf](http://www-pub.iaea.org/MTCD/publications/PDF/TCS-30_web.pdf)
- Kelly, M. (2020). *mimsy: Calculate MIMS Dissolved Gas Concentrations Without Getting a Headache*. R package version 0.6.2. <https://CRAN.R-project.org/package=mimsy>
- Mehlich, A. (1984). Mehlich 3 soil test extractant: A modification of Mehlich 2 extractant. *Communications in Soil Science and Plant Analysis*, 15(12), 1409–1416. <https://doi.org/10.1080/00103628409367568>
- Reddy, K. R., Clark, M. W., DeLaune, R. D., & Kongchum, M. (2013). *Physicochemical Characterization of Wetland Soils*. <https://doi.org/10.2136/sssabookser10.c3>
- Weiss, R. F. (1970). The solubility of nitrogen, oxygen and argon in water and seawater. *Deep Sea Research and Oceanographic Abstracts*, 17(4), 721–735. [https://doi.org/10.1016/0011-7471\(70\)90037-9](https://doi.org/10.1016/0011-7471(70)90037-9)
- Wright, A. F., & Bailey, J. S. (2001). Organic carbon, total carbon, and total nitrogen determinations in soils of variable calcium carbonate contents using a Leco CN-2000 dry combustion analyzer. *Communications in Soil Science and Plant Analysis*, 32(19–20), 3243–3258. <https://doi.org/10.1081/CSS-120001118>
